# Supplementary material
Source: publisher figshare collection journal article supplement (https://acs.figshare.com/ndownloader/files/4490419)
Supplement: Supplementary file 1 [file 4490419]

## Supporting information

### Predicting Sediment Sorption Coefficients for Linear Alkylbenzene Sulfonate Congeners from Polyacrylate-Water Partition Coefficients at Different Salinities

5 *Ángeles Rico-Rico,<sup>1,\*</sup> Steven T.J. Droge,<sup>1,2</sup> Joop L.M. Hermens<sup>1</sup>*

<sup>1</sup>Institute for Risk Assessment Sciences, Utrecht University, Yalelaan 2, 3508 TD, Utrecht, The Netherlands

<sup>2</sup>Helmholtz Centre for Environmental Research - UFZ, Permoserstr. 15, 04318, Leipzig, Germany

10 \*Corresponding author, Phone: +31 30 253 5018; Fax: +31 30 253 5077; E-mail: a.ricorico@gmail.com

Number of pages: 5

15

#### Contents:

- Section 1: Discussion on sorption of LAS congeners to polyacrylate SPME fiber.
- Table S1: Ion Composition of the Artificial GP2 Seawater (SW) and Dutch Standard Water (DSW).
- 20 – Figure S1: Fiber-water isotherms for C<sub>12</sub>-2-LAS at different seawater and freshwater dilutions.
- Figure S2: Fiber-water isotherms for C<sub>12</sub>-2-LAS at different Na<sup>+</sup> and Ca<sup>2+</sup> concentrations.
- Figure S3: Bioconcentration factors vs fiber-water partition coefficients.

25

**Table S1.** Ion Composition of the Artificial GP2 Seawater (SW) and Dutch Standard Water (DSW).

|                                             | SW                   | DSW                  |
|---------------------------------------------|----------------------|----------------------|
|                                             | mmol L <sup>-1</sup> | mmol L <sup>-1</sup> |
| Na <sup>+</sup> *                           | 418                  | 11                   |
| Mg <sup>2+</sup>                            | 46.73                | 0.30                 |
| Ca <sup>2+</sup>                            | 8.98                 | 1.36                 |
| K <sup>+</sup>                              | 8.92                 | 0.20                 |
| Sr <sup>2+</sup>                            | 0.08                 |                      |
| Cl <sup>-</sup>                             | 480                  | 2.70                 |
| SO <sub>4</sub> <sup>2-</sup>               | 24.80                | 0.30                 |
| HCO <sub>3</sub> <sup>-</sup>               | 2.02                 | 1.40                 |
| Br <sup>-</sup>                             | 0.74                 |                      |
| B <sub>4</sub> O <sub>7</sub> <sup>2-</sup> | 0.09                 |                      |

\*10 mM NaN<sub>3</sub> is considered for the calculation of Na<sup>+</sup> content in SW and DSW solutions.

30

35

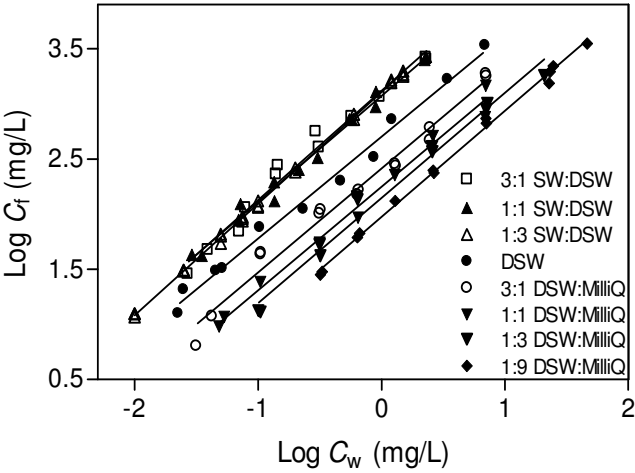

**Figure S1.** Fiber-water isotherms for  $C_{12}$ -2-LAS at different seawater and freshwater dilutions.

40

45

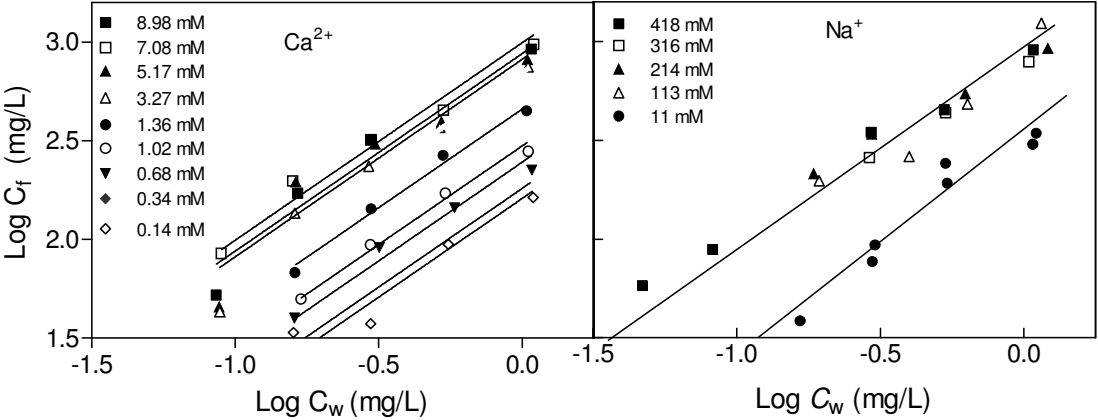

50

**Figure S2.** Fiber-water isotherms for  $C_{12}$ -2-LAS at different  $Na^+$  and  $Ca^{2+}$  concentrations.

55

60

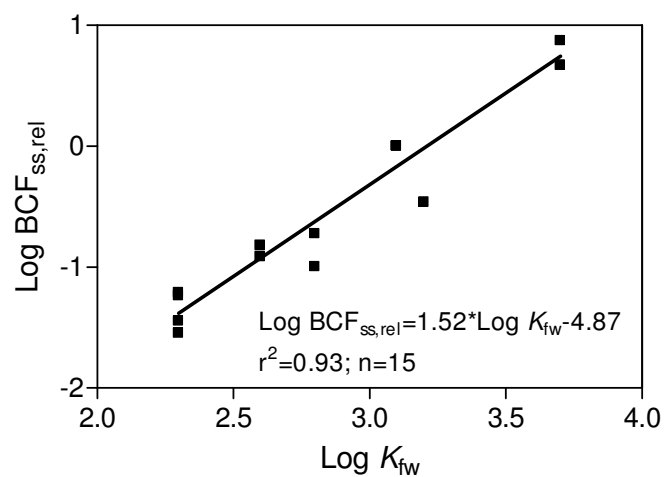

**Figure S3.** Relative Steady-state bioconcentration values (Reference compound: C<sub>12</sub>-2-LAS) according to ref. (1) vs estimates of log  $K_{\text{fw}}$  from ref.(2).

65

## Section 1. Discussion on sorption of LAS congeners to polyacrylate SPME fibers.

According to Jafvert *et al.* (3) the partitioning of an anionic organic compound to the octanol phase in a single electrolyte solution that contains divalent cations can be mainly described by the following reaction:

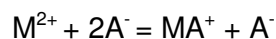

Where  $M^{2+}$  represents the divalent cation and  $A^{-}$  is the organic anion. In this reaction, the anionic organic compound is acting as a counterion to maintain electroneutrality. When fitting the  $K_{iw}$  values and the  $\log [Ca^{2+}]$  concentration from the simple electrolyte solution experiment to a sigmoidal curve with a fixed slope of 1, an apparent formation constant  $\log (K_{Ca(LAS)}^{+})$  of 2.5 is obtained. This value might be considered as an indication of the affinity of the partitioning of LAS at different  $Ca^{2+}$  concentration, but we cannot state if this is reflecting the real ion pair formation, since, to our knowledge, no formation constant of this complex is yet reported.

## References

- (1) Tolls, J.; Haller, M.; de Graaf, I.; Thijssen, M. A. T. C.; Sijm, D. T. H. M. Bioconcentration of LAS: Experimental determination and extrapolation to environmental mixtures. *Environ. Sci. Technol.* **1997**, *31*, 3426-3431.
- (2) Rico-Rico, A.; Droge, S. T. J.; Widmer, D.; Hermens, J. L. M. Freely dissolved concentrations of anionic surfactants in seawater solutions: Optimization of the non-depletive solid-phase microextraction method and application to linear alkylbenzene sulfonates. *J. Chromatogr., A* **2009**, *1216*, 2996-3002.
- (3) Jafvert, C. T.; Westall, J. C.; Grieder, E.; Schwarzenbach, R. P. Distribution of hydrophobic ionogenic organic compounds between octanol and water: Organic acids. *Environ. Sci. Technol.* **1990**, *24*, 1795-1803.
